# Supplementary material
Source: PubMed Central journal article supplement (PMC3947338)
Supplement: NIHMS516824-supplement-1.pdf [file NIHMS516824-supplement-1.pdf]

**Supplemental Table 1. Infectious Organisms**

| <b>Infectious Class</b>           | <b>Organism</b>                        |
|-----------------------------------|----------------------------------------|
| <b>Gram positive bacteria (N)</b> | <i>Staphylococcus aureus</i> (7)       |
|                                   | <i>Streptococcus mitis</i> (2)         |
|                                   | <i>Group B Streptococcus</i> (1)       |
|                                   | <i>Streptococcus viridians</i> (1)     |
| <b>Gram negative bacteria (N)</b> | <i>Pseudomonas aeruginosa</i> (2)      |
|                                   | <i>Escherichia coli</i> (1)            |
|                                   | <i>Bacteroides fragilis</i> (1)        |
|                                   | <i>Citrobacter freundii</i> (1)        |
| <b>Viruses (N)</b>                | <i>Respiratory syncytial virus</i> (2) |
|                                   | <i>Influenza A</i> (1)                 |
|                                   | <i>Rhinovirus</i> (1)                  |
|                                   | <i>Human metapneumovirus</i> (1)       |
|                                   | <i>Enterovirus</i> (1)                 |

Causative organisms isolated in patients with sepsis, severe sepsis and septic shock. N= number
