# Supplementary material
Source: PubMed Central journal article supplement (PMC3947338)

Supplemental Figure 1.

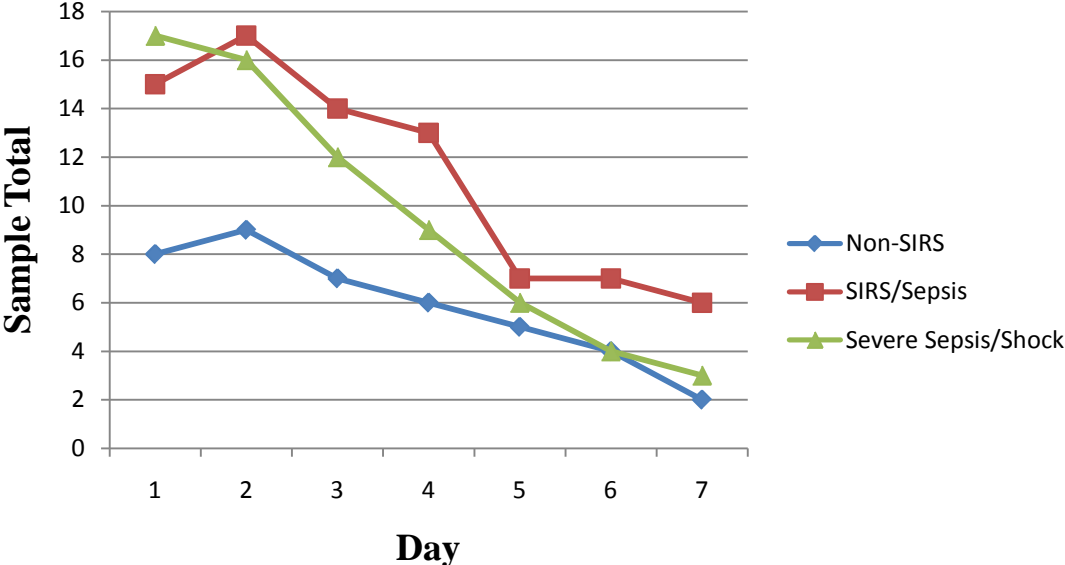

Supplement: NIHMS516824-supplement-2.pdf [file NIHMS516824-supplement-2.pdf]

**Supplemental Figure 2.**

**A.**

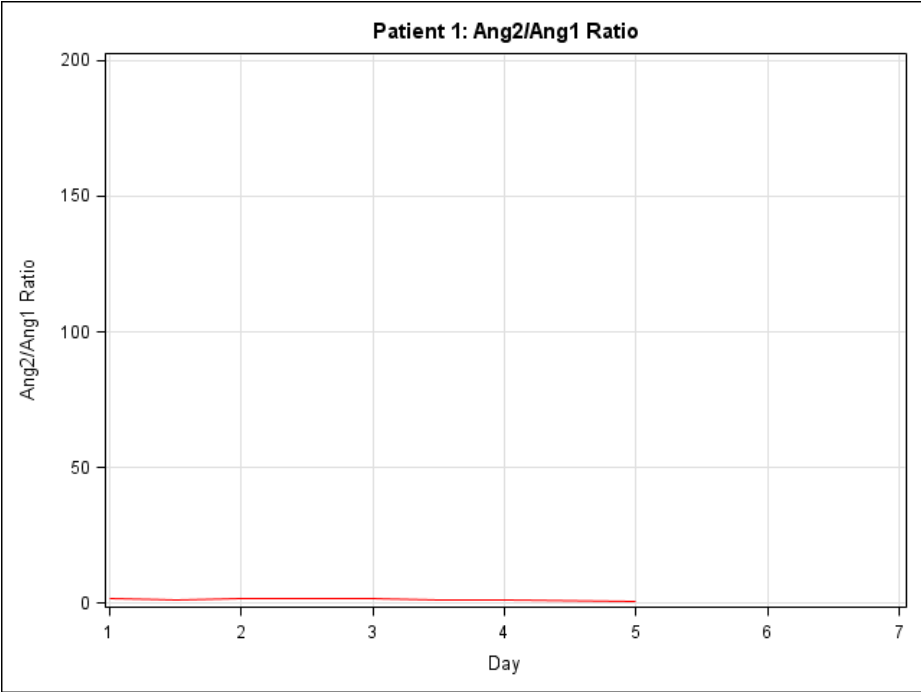

**B.**

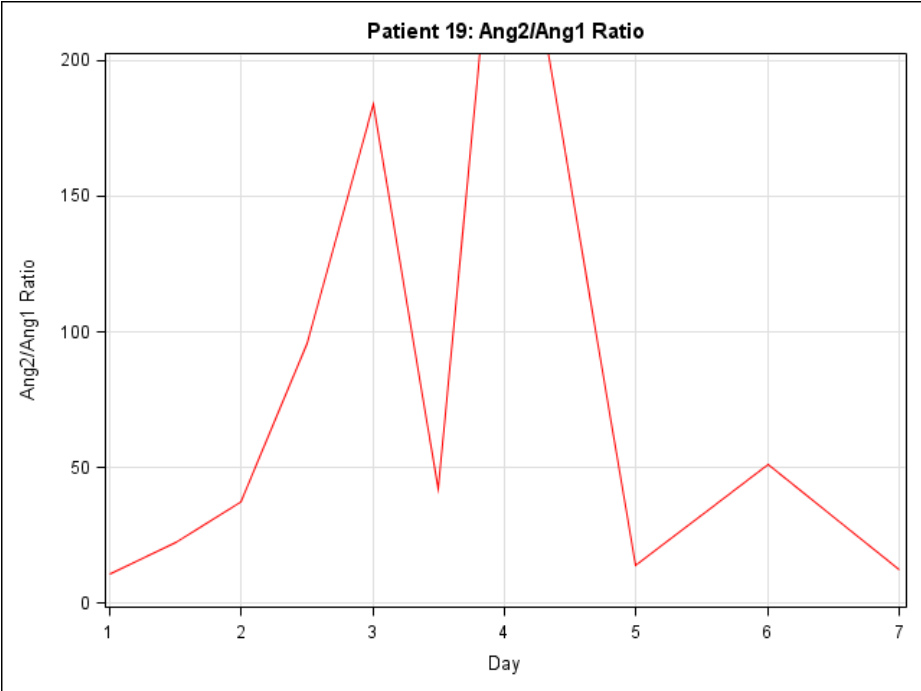

Supplement: NIHMS516824-supplement-3.pdf [file NIHMS516824-supplement-3.pdf]
